# Supplementary material for: A dual strategy of Na+/vacancy disorder and high Na to construct a P2-type cathode for high-stability sodium-ion batteries
Source: Royal Society of Chemistry journal article supplement (doi:10.1039/d4nr00187g), 2024-01-01
Supplement: d4nr00187g1.pdf [file d4nr00187g1.pdf]

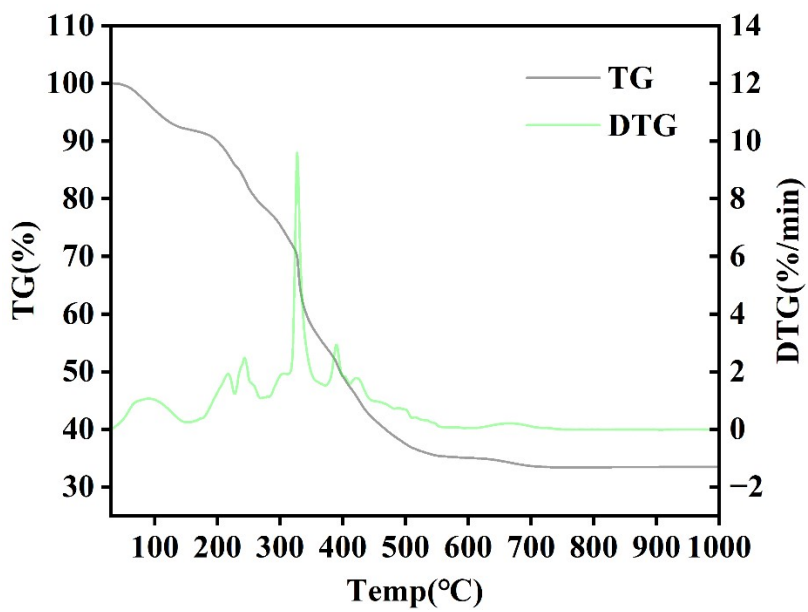

Figure S1 Thermogravimetric curve

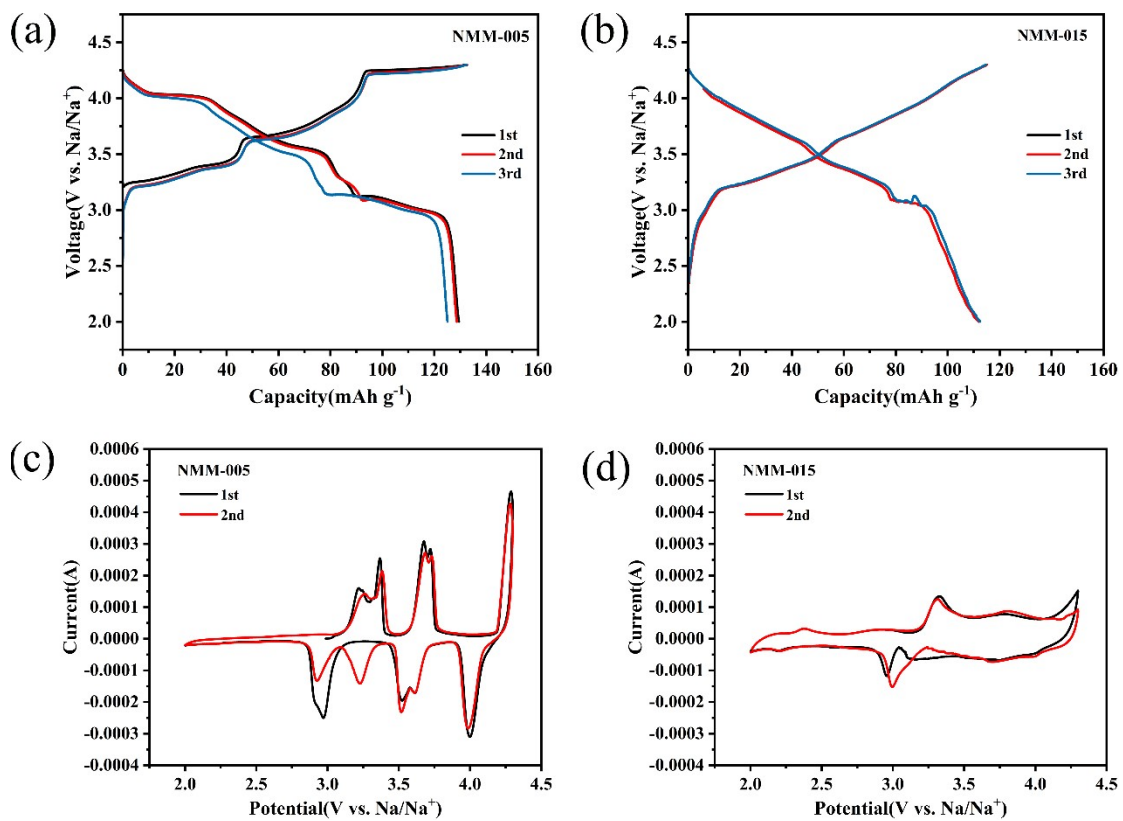

**Figure S2** Electrochemical performance of NMM-005 and NMM-015 (a) 、(b) GCD curves at 0.1C for the 1st, 2nd, and 3rd cycles (c) 、(d) CV curves at 0.1  $\text{mv s}^{-1}$ .

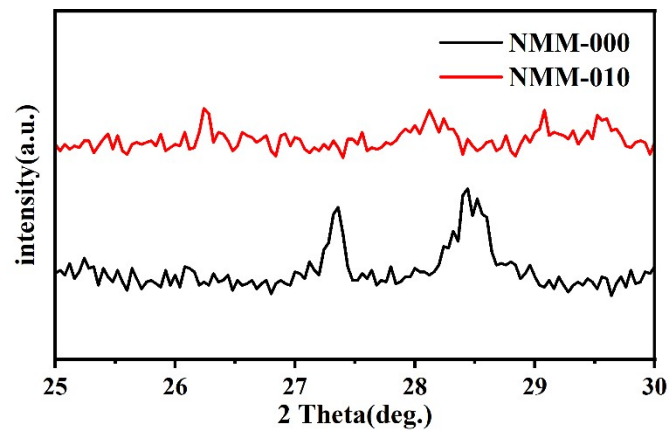

**Figure S3** XRD patterns of NMM-000 and NMM-010 in the 25°-30° diffraction angle range.

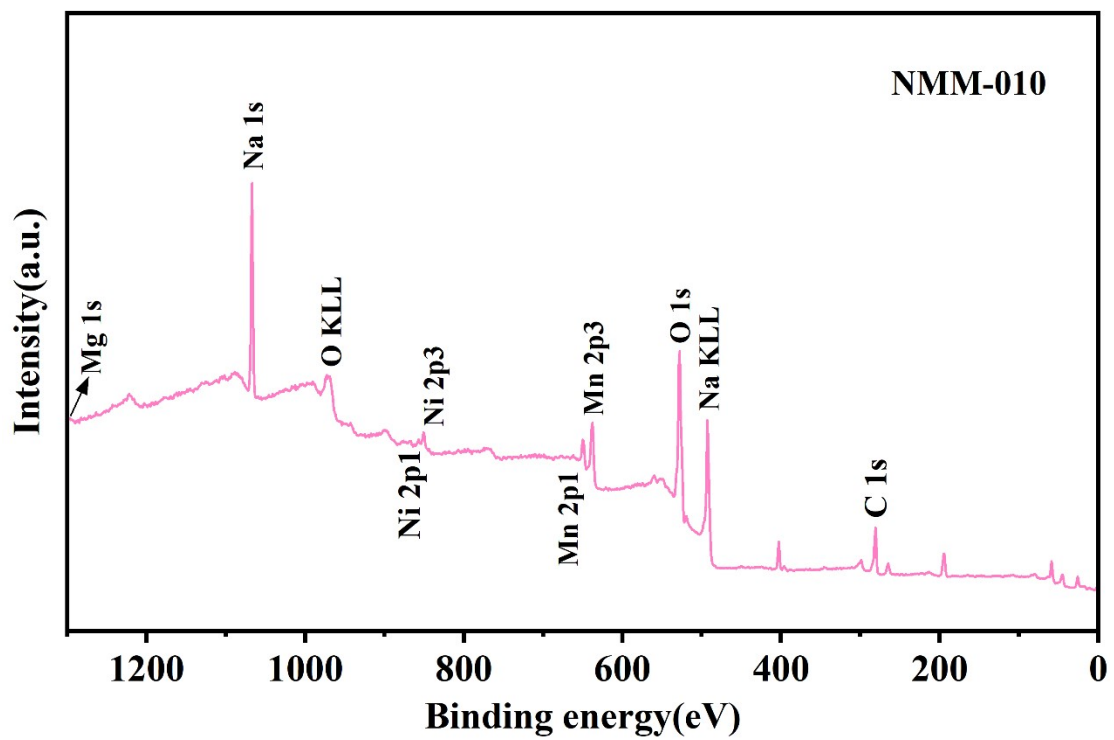

Figure S4 XPS wide of NMM-010.

|                | Stoichiometric |      |      |      | Tested |        |        |        |
|----------------|----------------|------|------|------|--------|--------|--------|--------|
|                | Na             | Ni   | Mn   | Mg   | Na     | Ni     | Mn     | Mg     |
| <b>NMM-000</b> | 0.75           | 0.33 | 0.67 | 0.00 | 0.7421 | 0.3356 | 0.6728 | 0.0000 |
| <b>NMM-005</b> | 0.75           | 0.28 | 0.67 | 0.05 | 0.7452 | 0.2781 | 0.6715 | 0.0495 |
| <b>NMM-010</b> | 0.75           | 0.23 | 0.67 | 0.10 | 0.7379 | 0.2310 | 0.6985 | 0.0984 |
| <b>NMM-015</b> | 0.75           | 0.18 | 0.67 | 0.15 | 0.7393 | 0.1762 | 0.6956 | 0.1498 |
| <b>NMM-020</b> | 0.75           | 0.13 | 0.67 | 0.20 | 0.7437 | 0.1358 | 0.6731 | 0.2053 |

**Table S1** Elemental compositions for  $\text{Na}_{0.75}\text{Ni}_{0.33-x}\text{Mg}_x\text{Mn}_{0.67}\text{O}_2$  ( $x = 0, 0.05, 0.1, 0.15, 0.2$ ) obtained from ICP-OES measurements.

| Sample                     | NMM-000 | NMM-010 |
|----------------------------|---------|---------|
| a/Å                        | 2.9804  | 2.9854  |
| c/Å                        | 11.1575 | 11.1670 |
| Cell volume/Å <sup>3</sup> | 80.7332 | 81.0745 |
| R <sub>wp</sub> /%         | 9.71    | 9.08    |
| R <sub>p</sub> /%          | 8.69    | 7.57    |
| Gof                        | 1.56    | 1.43    |

**Table S2** Summary of refined structural parameters of NMM-000 and NMM-010
